# Supplementary material
Source: PubMed Central journal article supplement (PMC3858991)
Supplement: gf590de_10-1055-s-0032-1328185.pdf [file gf590de_10-1055-s-0032-1328185.pdf]

# Ärztinnen und Ärzte in der Frauenheilkunde in den Kliniken – Analyse der Auswirkungen der „Feminisierung“ aus der Perspektive der leitenden Ärzte

Male and Female Physicians in Hospital Gynaecology Departments – Analysis of the Impact of “Feminisation” from the Viewpoint of Medical Directors

## Autoren

T. Riepen<sup>1</sup>, V. Möbus<sup>2</sup>, U. Kullmer<sup>3</sup>, H. R. Tinneberg<sup>4</sup>, K. Münstedt<sup>4</sup>

## Institute

<sup>1</sup> Frauenarztpraxis, Weilburg

<sup>2</sup> Klinikum Frankfurt Höchst GmbH, Klinik für Gynäkologie, Frankfurt

<sup>3</sup> Asklepios Klinik Lich, Klinik für Gynäkologie und Geburtshilfe, Lich

<sup>4</sup> Universitätsklinikum Gießen und Marburg GmbH, Standort Gießen, Zentrum für Frauenheilkunde & Geburtshilfe, Gießen

## Schlüsselwörter

- Feminisierung
- Frauenheilkunde
- Geburtshilfe
- Karriereplanung
- Motivation

## Key words

- feminisation
- gynaecology
- obstetrics
- career planning
- motivation

## Zusammenfassung

**Einleitung:** Aktuell wird das Thema „Feminisierung“ in der Medizin, also der Zunahme des Anteils weiblicher Mitarbeiter, vielfach diskutiert, doch es gibt nur wenige Daten, auf deren Basis sich eine wissenschaftliche Diskussion führen lässt. Es stellt sich die Frage nach möglichen sich daraus ergebenden Schwierigkeiten für das Fach Frauenheilkunde und Geburtshilfe.

**Methode:** Mithilfe eines Erhebungsbogens wurden die Leiter von Kliniken für Gynäkologie und Geburtshilfe zu verschiedenen Aspekten rund um das Thema Feminisierung in der Gynäkologie und Geburtshilfe befragt.

**Ergebnis:** Bei Bewerbungen liegt der Anteil weiblicher Bewerber aktuell bei geschätzten 84,2%. Als Hintergründe der Feminisierung im Fachgebiet wurden geringes Einkommen, der Ansehensverlust des Arztberufs und die schlechten Karriereaussichten am häufigsten genannt. Unter den spontan genannten Gründen wurden das zunehmend weiblich geprägte Bild des Frauenarztes und die Arbeitsbedingungen in den Kliniken als Ursachen erwähnt. Während die Übernahme operativer Tätigkeit und von Leitungsfunktionen von Frauen deutlich weniger gewünscht werden als von Männern, empfanden die Befragten weibliche und männliche Mitarbeiter gleichermaßen motiviert, Aufgaben außerhalb der Dienstzeiten zu übernehmen oder sich in der Forschung zu engagieren.

**Diskussion:** Die Feminisierung in der Medizin stellt eine Herausforderung dar. Das Erfassen und die Erforschung der Motivation von Mitarbeitern in Bezug auf ihre Wünsche im Arbeitsleben erscheint wichtig, um anhand der sich daraus ergebenden Befunde bedarfsgerechte Arbeitsangebote unterbreiten zu können.

## Abstract

**Introduction:** At present the topic “feminisation” in medicine, in other words the increasing number of female staff members is under heavy discussion; however, there are only few data upon the basis of which a scientific discussion can be held. The question arises as to the possibility of problems arising therefrom for the specialty gynaecology and obstetrics.

**Methods:** With the help of a questionnaire the directors of departments of gynaecology and obstetrics were questioned about the various aspects of the topic feminisation in gynaecology and obstetrics.

**Results:** Among current applications the proportion of female applicants is estimated to be 84.2%. Reasons given most frequently for the feminisation in the specialty include low income, loss of face of the medical profession and the poor career chances. Among the spontaneously mentioned reasons were the increasingly female dominated image of gynaecology and the working conditions in hospitals. Whereas the taking on of surgical duties and of directing functions was less markedly desired by women than by men, the questioned directors found that male and female staff members were equally motivated to take on duties outside of their working hours or to engage in research work.

**Discussion:** Feminisation in medicine represents a challenge. It seems to be important to evaluate and investigate the motivation of staff members with regard to their wishes in professional life and thus to be able to offer an appropriate working environment based on the survey results.

**eingereicht** 5.12.2012  
**revidiert** 16.12.2012  
**akzeptiert** 21.12.2012

## Bibliografie

**DOI** <http://dx.doi.org/10.1055/s-0032-1328185>  
Geburtsh Frauenheilk 2013; 73:  
1–6 © Georg Thieme Verlag KG  
Stuttgart · New York ·  
ISSN 0016-5751

## Korrespondenzadresse

**Prof. Dr. Karsten Münstedt**  
Universitätsklinikum Gießen  
und Marburg GmbH,  
Standort Gießen  
Zentrum für Frauenheilkunde  
& Geburtshilfe  
Klinikstraße 33  
35392 Gießen  
karsten.muenstedt@  
gyn.med.uni-giessen.de

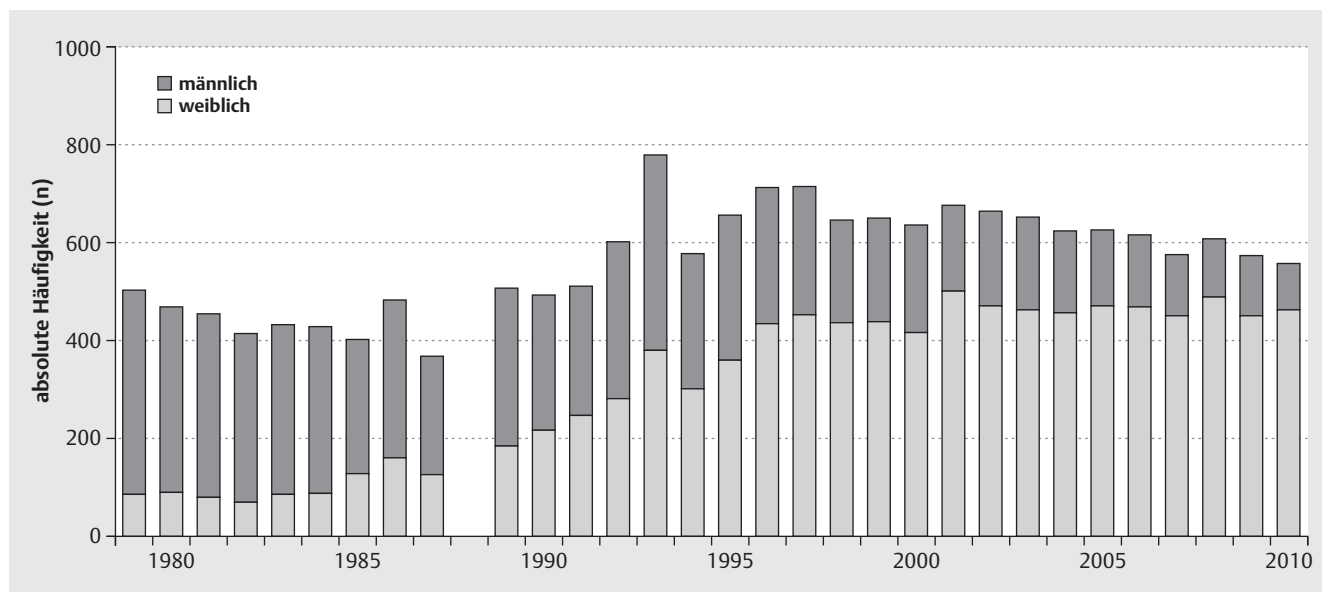

**Abb. 1** Gesamtzahl der abgeschlossenen Facharztprüfungen im Fach Gynäkologie und Geburtshilfe aufgeschlüsselt nach Geschlecht (Quelle: Bundesärztekammer).

## Einleitung

▼ Wenngleich es für Frauen in der Antike und im frühen Mittelalter möglich, aber nicht üblich war, an Akademien zu studieren und zu lehren, bekamen in den darauffolgenden Jahrhunderten Frauen meist nur dann Zugang zu Bildung, wenn sie in ein Kloster eintraten [1]. In wenigen Fällen erreichten sie Berühmtheit, wie Trotula di Ruggiero, die wohl im 11. Jahrhundert als praktische Ärztin an der Medizinschule in Salerno wirkte und an der medizinischen Enzyklopädie *Practica brevis* mitwirkte. In manchen Fällen erhielten Frauen die Doktorwürde, wie Marianne Theodore Charlotte v. Siebold Heidenreich, geb. Heiland (1788–1859), die im März 1817 in Gießen mit der Arbeit „Über Schwangerschaft außerhalb der Gebärmutter und über Bauchhöhlenschwangerschaft insbesondere“ promoviert wurde (<http://de.wikipedia.org/wiki/Frauenstudium>). 1898 begann Frau Hermine Heusler-Edenhuizen mit dem Medizinstudium in Deutschland. 1903 erhielt sie an der Universitätsfrauenklinik Bonn als erste Frau eine bezahlte Assistentenstelle. 1909 komplettierte sie ihre Facharztausbildung und wurde die erste Fachärztin für Frauenkrankheiten und Geburtshilfe in Deutschland [2]. Doch allgemein war es erst ab 1900 in Deutschland für Frauen möglich, ein Studium der Humanmedizin aufzunehmen [3].

Während in den folgenden Jahrzehnten noch Männer die Medizin dominierten, hat sich inzwischen die Situation deutlich geändert. 2006 lag der Frauenanteil bei Studienanfängern des Medizinstudiums bei 63 Prozent bei einem Frauenanteil von 40% unter den berufstätigen Ärzten [4]. Diese Veränderung zieht Konsequenzen in der medizinischen Versorgung nach sich, denn von Frauen wird heute erwartet, dass sie sowohl beruflich „ihren Mann stehen“ als auch privat die Familie managen, obwohl sie wohl weniger soziale Unterstützung und Entlastung durch ihre Partner erfahren als ihre männlichen Kollegen [2]. Frauen scheinen auch eine andere Motivation bei der Ausübung des Arztberufs zu haben. Ihnen geht es weniger um Macht und Geld, wenn sie eine Führungsposition anstreben, sondern sie wollen eher gestalten, ihrem Leben einen Sinn geben und ihr Wissen

ausbauen [4]. Aufgrund dieser Unterschiede verläuft die Karriere von Medizinerinnen unterschiedlich. Sie sind häufiger in Teilzeitstellen beschäftigt, promovieren verhältnismäßig seltener und verfassen auch deutlich seltener Habilitationen [4].

Eine Analyse der Bundesärztekammer aus dem Jahre 2009 ergab deutliche Unterschiede zwischen dem Anteil von Ärztinnen in den verschiedenen Fachgebieten [5]. Im Fachgebiet Frauenheilkunde und Geburtshilfe lag damals der Anteil von Frauen bei 55%. Doch wie **Abb. 1** zeigt, liegt der Beginn der Entwicklung hin zu einer „Feminisierung“, wie dieser Prozess in aktuellen Arbeiten bezeichnet wird, im Bereich Gynäkologie und Geburtshilfe, bereits länger zurück [6].

Bereits 2008 erfolgte eine Umfrage von Kliniken für Gynäkologie und Geburtshilfe in Deutschland zur Geschlechterverteilung, zu diesbezüglichen Meinungen und zur Einschätzungen ihrer Konsequenzen. Diese zeigte, dass damals bereits mehr als 80% der Fachärzte und Assistenten weiblich waren und der Anteil an Frauen bei Bewerbungen im Mittel bei etwa 90% lag [7]. Die Details dieser Befragung wurden allerdings nie als Originalarbeit veröffentlicht. Aufgrund der möglichen Bedeutung des Geschlechterwandels für das Fach Gynäkologie und Geburtshilfe wurde daher die Befragung Ende 2011/Anfang 2012 mit ergänzter Fragestellung wiederholt.

## Material und Methode

### ▼ Erhebungsbogen

Basierend auf dem Fragebogen der früheren Erhebung und der oben genannten Literatur wurde der Fragebogen mit ursprünglich 10 Fragen erweitert, um Aspekte der Auswirkungen des Geschlechterwandels, zum Beispiel in der Forschung zu erfassen. Ein Exemplar des Erhebungsbogens kann bei Interesse angefordert werden.

Der Fragebogen wurde Ende 2011/Anfang 2012 an die leitenden Ärzte, Chefärzte und Direktoren sämtlicher 470 Kliniken für Gynäkologie und Geburtshilfe in Deutschland per Post verschickt

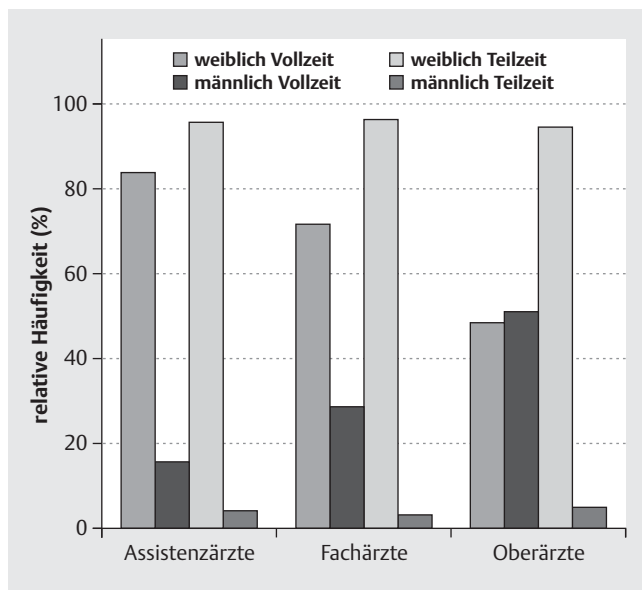

**Abb. 2** Anteil weiblicher und männlicher Mitarbeiter bei Teilzeitkräften bei Assistenzärzten, Fachärzten und Oberärzten.

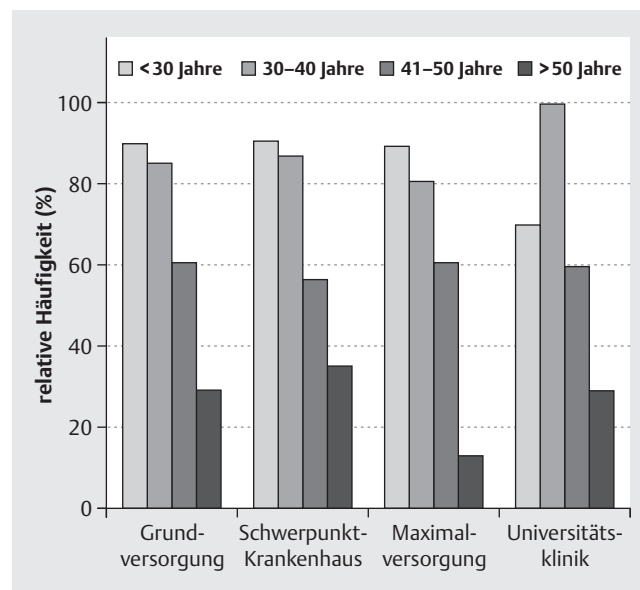

**Abb. 3** Anteil weiblicher Mitarbeiter in verschiedenen Altersgruppen an verschiedenen Krankenhäusern.

[13]. Die ausgefüllten Exemplare konnten sowohl per Post, Fax oder E-Mail zurückgeschickt werden. Im März 2012 wurden Kliniken, die bis dahin nicht geantwortet hatten, nochmals an die Umfrage erinnert. Die Studie begann, nachdem ein positives Votum der Gießener Ethikkommission vorlag (Antragsnummer 83/2011).

Die Erfassung der Daten und die statistische Analyse erfolgte unter Verwendung von SPSS.

## Ergebnisse

203 Fragebögen wurden zurückgesendet, die Rücklaufquote betrug damit 43,2% (203/470). Ausgewertet wurden 106 Krankenhäuser der Grund- und Regelversorgung, 50 Schwerpunktkrankenhäuser, 31 Krankenhäuser der Maximalversorgung und 13 Universitätskliniken. Der Mittelwert der gesamten ärztlichen Stellen in den einzelnen Krankenhäusern beträgt 8,8 für Krankenhäuser der Grund- und Regelversorgung, 12,5 für Schwerpunktkrankenhäuser, 15,1 für Krankenhäuser der Maximalversorgung und 27,6 für Universitätskliniken.

## Aktuelle Geschlechter und Altersverteilung

Abb. 2 zeigt den Anteil weiblicher und männlicher Mitarbeiter unter den Assistenzärzten, Fachärzten und Oberärzten, auch differenziert nach Vollzeit- und Teilzeitstellen. Weibliche Mitarbeiter dominieren im Assistenzarzt-, Facharzt- und Oberarzbereich und insbesondere im Bereich der Teilzeitkräfte. Lediglich bei leitenden Oberärzten und Chefärzten sind weibliche Frauenärzte unterrepräsentiert. Ihr Anteil beträgt hier nur 33,5, bzw. 16,5%. Die weiteren Analysen ergaben, dass männliche Ärzte mit Teilzeitverträgen deutlich häufiger in Abteilungen von Krankenhäusern der Maximalversorgung oder in Universitätskliniken anzutreffen sind (32 und 23% vs. 15 und 8% in Krankenhäusern der Grund- und Schwerpunktversorgung;  $\chi^2 = 8,8$ ;  $df = 3$ ;  $p = 0,032$ ). Die Ergebnisse waren unabhängig vom Geschlecht des Chefarztes der Abteilung oder der Art des Krankenhauses (ONE-WAY ANOVA).

Es zeigte sich aber ein Trend, dass der Anteil weiblicher Chefärzte in Krankenhäusern der Grund- und Regelversorgung sowie der Schwerpunktversorgung höher war im Vergleich zu Häusern der Maximalversorgung und Universitätskliniken ( $p_{\chi^2} = 0,069$ ).

Abb. 3 zeigt den Anteil weiblicher Mitarbeiter in verschiedenen Altersgruppen und beschreibt, dass der Anteil weiblicher Mitarbeiter in den jüngeren Altersgruppen dominiert.

## Bewerbungssituation und subjektiv wahrgenommene Hintergründe der Veränderungen

Was die Bewerbungssituation betrifft, liegt der Anteil der Bewerbungen von Ärztinnen bei geschätzten 84,2%. Die Art des Krankenhauses oder die Frage, ob der Chefarzt männlich oder weiblich ist, spielten dabei wiederum keine Rolle (ONE-WAY ANOVA). Der Eindruck, dass in den letzten Jahren Veränderungen der Bewerbungssituation zugunsten weiblicher Mitarbeiter stattgefunden haben, wird von 96,5% (193/200) der Antwortenden geteilt. Abb. 4 zeigt die Antworten auf die Frage: „Welche Faktoren halten Sie für ausschlaggebend, dass sich eher weibliche Kolleginnen bewerben?“ Von den vorgegebenen Antwortmöglichkeiten, die auf den Ergebnissen von Berichten in der Literatur basierten, wurden geringes Einkommen, der Ansehensverlust des Arztberufs und die schlechten Karriereaussichten am häufigsten genannt. Da die Befragten auch die Möglichkeit hatten, spontan Gründe darzustellen, wurden die spontanen Antworten farblich abgegrenzt. Hier wurden von den Antwortenden das zunehmend weiblich geprägte Bild des Frauenarztes und die Arbeitsbedingungen in den Kliniken als Ursachen genannt.

Die Frage, ob der ansteigende Anteil weiblicher Mitarbeiter Einfluss auf die Organisation des Klinikbetriebs hat, beantworteten 75,5% (151/200) mit ja. Nach den Schätzungen streben deutlich weniger weibliche Mitarbeiter eine langfristige Karriere in der Klinik an oder sind an der Übernahme einer leitenden Position in einer Klinik interessiert. Weibliche Mitarbeiter sind dagegen deutlich häufiger an der Niederlassung interessiert (Abb. 5). 80,4% der Befragten (160/199) fanden es insgesamt schwieriger, junge Kollegen gleich welchen Geschlechts zu einer langfristigen

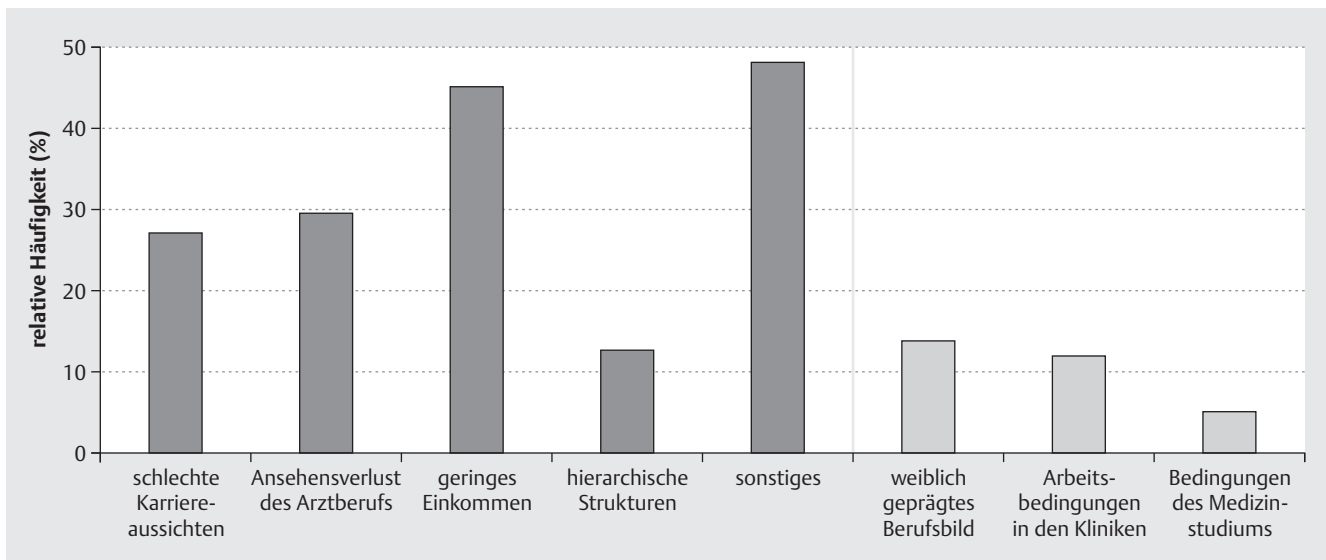

**Abb. 4** Von den Befragten wahrgenommene Hintergründe der Veränderungen des Geschlechterverhältnisses im Bereich Frauenheilkunde und Geburtshilfe. Dunkelgrau – vorgegebene Antworten. Hellgrau – spontane Antworten unter Sonstiges.

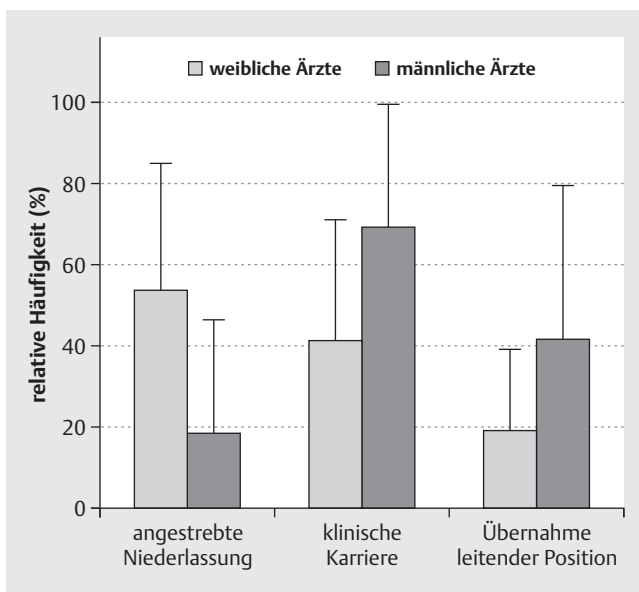

**Abb. 5** Angenommener Anteil weiblicher und männlicher Mitarbeiter mit verschiedenen Berufszielen (Mittelwerte und Standardabweichung).

klinischen Laufbahn und/oder zu einer operativen Laufbahn zu motivieren. Die Mehrheit (63,9%; 127/194) empfanden aber weibliche und männliche Mitarbeiter gleichermaßen motiviert, Aufgaben außerhalb der Dienstzeiten zu übernehmen und dies betrifft auch die Motivation zur Forschung (71,4%; 125/175). Die Analyse derjenigen, die der Meinung waren, dass es Unterschiede zwischen den Geschlechtern gab, zeigte, dass weibliche Mitarbeiter geringfügig bereitwilliger betrachtet wurden, Aufgaben außerhalb der Dienstzeiten zu übernehmen (52,6%), während männliche Mitarbeiter eher als bereit betrachtet wurden, sich an der Forschung zu beteiligen (58,9%). Auch diese Einschätzungen waren unabhängig vom Geschlecht der Chefärzte der Abteilung ( $\chi^2$ -Test).

### Organisation des Klinikbetriebs mit Voll- und Teilzeitstellen sowie mit Honorarärzten

Bei der Frage, ob sich der Klinikbetrieb besser mit Vollzeit-, Teilzeitkräften oder einem ausgewogenen Verhältnis organisieren ließe, wurde von der Mehrheit (64,8%; 129/199) den Vollzeitkräften der Vorzug gegeben. Nur 5,0% (10/199) bevorzugten Teilzeitkräfte und 30,2% (60/199) sprachen sich für ein ausgewogenes Verhältnis von Vollzeit- und Teilzeitstellen aus. Der  $\chi^2$ -Test zeigte, dass diese Einschätzung unabhängig davon war, in welchem Typ Krankenhaus der Chefarzt beschäftigt war, es zeigte sich aber ein Trend ( $p = 0,060$ ) dafür, dass Chefärztinnen eher ein ausgewogenes Verhältnis von Teilzeit- und Vollzeitstellen bevorzugten. Im Mittel wurde das Verhältnis von 1 Teilzeitstelle auf 2 Vollzeitstellen als sinnvoll betrachtet.

30,3% (60/198) aller Kliniken arbeiteten mit Honorarärzten zusammen. Dieser Anteil war in etwa gleich bei den verschiedenen Krankenhaustypen, allerdings arbeitete nur eine der Universitätskliniken mit Honorarärzten zusammen. Honorarärzte wurden signifikant häufiger zum Dienst verpflichtet, wenn der Anteil von weiblichen Fachärzten in der Abteilung höher war (ONE-WAY ANOVA;  $F = 3,95$ ;  $df = 2$ ;  $p = 0,029$ ). Honorarärzte waren überwiegend männlich. Im Mittel waren 0,4 Stellen ( $SD = 0,8$ ) an den Krankenhäusern mit weiblichen Honorarärzten besetzt, 1,2 Stellen mit männlichen Honorarärzten ( $SD = 0,9$ ). Honorarärzte wurden meist im Nachtdienst eingesetzt (45,6%; 26/57), aber auch häufig im Tag- und Nachtdienst (38,6%; 22/57) und nur selten ausschließlich im Tagdienst (15,8%; 9/57). Hier fanden sich auch geschlechtsspezifische Unterschiede. Männliche Honorarärzte wurden bevorzugt im Nachtdienst, bzw. sowohl im Tag- und Nachtdienst eingesetzt (● **Tab. 1**).

### Diskussion

Die gegenwärtige Analyse der Beschäftigungssituation von weiblichen und männlichen Ärzten in der Frauenheilkunde bestätigt die eingangs dargestellte Situation der „Feminisierung“ im Fach Gynäkologie und Geburtshilfe, die im Vergleich zu anderen Fä-

**Tab. 1** Geschlechtsspezifische Unterschiede beim Einsatz von männlichen und weiblichen Honorarärzten ( $\chi^2 = 11,2$ ;  $df = 4$ ;  $p = 0,025$ ).

|          | Tagdienst | Nachtdienst | Tag- und Nachtdienst | gesamt      |
|----------|-----------|-------------|----------------------|-------------|
| weiblich | 4 (50,0%) | 3 (37,5%)   | 1 (12,5%)            | 8 (100,0%)  |
| männlich | 4 (11,4%) | 14 (40,0)   | 17 (48,6%)           | 35 (100,0%) |
| beide    | 0 (0,0%)  | 6 (60,0%)   | 4 (40,0%)            | 10 (100,0%) |

chern deutlicher ausgeprägt ist. Die Entscheidung für das Fach fällt bereits mit dem Abschluss des Studiums, vielleicht sogar früher, und Gynäkologie und Geburtshilfe sowie Kinderheilkunde sind die Fächer mit der größten Frauenpräferenz [8]. Die gegenwärtige Untersuchung bestätigt die frühere Analyse von 2008 [7] und zeigt, dass dieser Prozess nicht nur positiv bewertet wird, denn diese Veränderung und die Zunahme von Teilzeitstellen machen Änderungen der allgemeinen Organisation in den Kliniken notwendig. Die Mehrheit der Befragten hält es für am einfachsten, die Dienstpläne mit Vollzeitstellen zu gestalten. Möglicherweise wurde das Potenzial von Teilzeitstellen jedoch noch nicht erkannt, denn nach einer Studie, die für das Bundesministerium für Familie, Senioren, Frauen und Jugend erstellt wurde, kann das Angebot von Teilzeitstellen qualifizierten Müttern den Wiedereinstieg in den Arbeitsmarkt ermöglichen und damit dem Fachkräftemangel entgegenwirken, wobei auch der Staat profitieren soll, da sich Einnahmen durch Sozialversicherungsbeiträge und Steuern ergeben ([http://www.iza.org/en/webcontent/publications/reports/report\\_pdfs/iza\\_report\\_33.pdf](http://www.iza.org/en/webcontent/publications/reports/report_pdfs/iza_report_33.pdf)).

Interessant ist es außerdem, dass sich Sichtweisen weiblicher und männlicher Chefarzte im Fachgebiet nicht unterscheiden und auch die Art des Krankenhauses kaum einen Einfluss auf die Antworten hatte. Der Befund, dass männlichen und weiblichen Honorarärzten unterschiedliche Dienstzeiten zugewiesen werden, stellt die Frage, ob die Teilnahme an Nachtdiensten oder Bereitschaftsdiensten an Wochenenden für weibliches Personal grundsätzlich weniger attraktiv ist als für männliches. Diese Frage wurde bislang in der Forschung nicht thematisiert. Auch in Hinsicht auf Dienstzeiten gibt es unterschiedliche Vorstellungen zwischen Frauen und Männern. Nur 40% der Studienabgängerinnen streben nach Abschluss der Facharztausbildung eine Vollzeitstelle an [8]. Unterschiedliche Berufsziele von männlichen und weiblichen Assistenten nach der Facharztausbildung erschweren demnach das Heranziehen des Nachwuchses im operativen Bereich und damit zur Ausbildung von hoch qualifizierten Operateuren und zukünftigen Chefärzten. Nach der Studie von Gedrose et al. [8] ist der Anteil der Männer, die Oberarzt werden wollen, 1,5-mal höher als bei den Frauen und in Bezug auf eine Chefarztposition sogar 5,4-mal höher. Dagegen ist der Anteil der Frauen, die „nur“ als Fachärztin im Krankenhaus tätig werden möchten, 3,7-mal höher als bei den Männern und insgesamt strebten 1,3-mal mehr Frauen als Männer eine Niederlassung als Gebietsärztin an. Dazu kommt, dass Frauen aus unterschiedlichen Gründen auf ihre weitere Qualifikation oft verzichten [4].

Da der gynäkologische Nachwuchs fast ausschließlich weiblich ist und männliche Kräfte im Oberarztbereich eher älter sind, scheint es wahrscheinlich, dass sich der Mangel an Oberärzten in den Kliniken weiter verschärfen wird. Dies gilt vor allem im Hinblick auf die Anstellungen als Vollzeitkräfte. Wie aus **Abb. 1** auch abzulesen ist, hat die absolute Zahl der Ärzte, welche die Facharztprüfung ablegen, seit Ende der 90er-Jahre kontinuierlich abgenommen, was die Problematik verschärft.

Ein mögliches Zukunftsszenario könnte so aussehen, dass Patientinnen in Sprechstunden und Ambulanzen tagsüber fast ausschließlich von weiblichen Ärzten behandelt werden, aber im Falle notwendiger Operationen oder in den Bereitschaftsdienstzeiten auf ein eher männlich geprägtes Team treffen [7]. Ob sich dies realisieren wird, hängt davon ab, inwieweit es gelingen wird, weibliche Ärzte zukünftig mehr für die klinische Laufbahn zu motivieren. Da ein vergleichsweise geringes Einkommen und die Arbeitsbedingungen in den Kliniken (Nachtdienste) Gründe darstellen, die die Entscheidung gegen eine klinische Laufbahn bestimmen, sollten in diesen Bereichen Veränderungen angestrebt werden, um zukünftig eine ausreichende Personalausstattung in den Kliniken zu sichern.

Als Vorteile der Entwicklung hin zu mehr weiblichen Gynäkologen sind zu nennen, dass die islamisch orientierten Bevölkerungsgruppen weibliche Gynäkologen bevorzugen, während den meisten Frauen es sonst mehr auf die Kompetenz des Gegenübers ankommt [9–11]. Positiv könnte sich auch auswirken, dass weibliche Gynäkologen seltener von Patientinnen verklagt werden, weil sie eine bessere Kommunikation pflegen als ihre männlichen Kollegen [12].

Da weibliche Ärzte als ebenso bereit gesehen werden, sich an der Forschung zu beteiligen, wird der Geschlechterwandel in diesem Bereich keine negativen Auswirkungen haben.

Zusammenfassend stellt die Feminisierung eine große strukturelle Herausforderung dar, da die Übernahme operativer Tätigkeit und von Leitungsfunktionen von Frauen deutlich weniger gewünscht werden als von Männern. Diese Studie war nicht darauf angelegt, alle Hintergründe zu diesem Themenkomplex zu erforschen. Dieses sowie die Erforschung der Motivation von Mitarbeitern in Bezug auf ihre Wünsche im Arbeitsleben erscheinen jedoch als sehr wichtig, um anhand der sich daraus ergebenden Befunde bedarfsgerechte Arbeitsangebote unterbreiten und Arbeitsbedingungen attraktiver gestalten zu können. So kann dem Mangel an Fachkräften sicher am ehesten konstruktiv wirksam begegnet werden.

## Interessenkonflikt

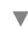

Nein.

## Literatur

- 1 Kirchhoff A. Die akademische Frau. Gutachten herausragender Universitätsprofessoren, Fachlehrer und Schriftsteller über die Befähigung zum wissenschaftlichen Studium und Beruf. 1897. Im Internet: <http://archive.org/details/dieakademischef02kirchoog/Stand:30.11.2012>
- 2 Prähm H. Hermine Heusler-Edenhuizen: Die erste deutsche Frauenärztin: Lebenserinnerungen im Kampf um den ärztlichen Beruf der Frau. 3. Auflage. Leverkusen: Budrich Verlag; 2005
- 3 Bestmann B, Rohde V, Wellmann A et al. Berufsreport 2003: Geschlechterunterschiede im Beruf. Dtsch Arztebl 2004; 101: A-776/B-642/C-626
- 4 Hibbeler B, Korzilius H. Arztberuf: Die Medizin wird weiblich. Dtsch Arztebl 2008; 105: A-609/B-539/C-527

- 5 *Kopetsch T.* Dem deutschen Gesundheitswesen gehen die Ärzte aus! Studie zur Altersstruktur und Arztlzahlentwicklung. 5. aktualisierte und komplett überarbeitete Auflage. Berlin: Bundesärztekammer und Kassenärztliche Bundesvereinigung; 2010. Im Internet: [http://baek.de/downloads/Arztzahlstudie\\_03092010.pdf](http://baek.de/downloads/Arztzahlstudie_03092010.pdf); Stand: 30.11.2012
- 6 *Bühren A, Eckert J.* „Feminisierung“ der Ärzteschaft: Überschätzter Effekt. Dtsch Arztebl 2011; 108: A-1168/B-968/C-9689
- 7 *Riepen TK, Vescia M, Möbus VJ.* Zur Verteilung von weiblichen und männlichen Ärzten in der Frauenheilkunde: Eine Bestandsaufnahme. Geburtsh Frauenheilk 2008; 68: PO\_Gyn\_03\_08
- 8 *Gedrose B, Wonneberger C, Jünger J et al.* Haben Frauen am Ende des Medizinstudiums andere Vorstellungen über Berufstätigkeit und Arbeitszeit als ihre männlichen Kollegen? Deutsche Medizinische Wochenschrift 2012; 137: 1242–1247
- 9 *Amir H, Tibi Y, Groutz A et al.* Unpredicted gender preference of obstetricians and gynecologists by Muslim Israeli-Arab women. Patient Educ Couns 2012; 86: 259–263
- 10 *Howell EA, Gardiner B, Concato J.* Do women prefer female obstetricians? Obstet Gynecol 2002; 99: 1031–1035
- 11 *Baethge C.* Forscherinnen werden forscher. Dtsch Arztebl 2008; 105: 507–509
- 12 *Taragin MI, Wilczek AP, Karns ME et al.* Physician demographics and the risk of medical malpractice. Am J Med 1992; 93: 537–542
- 13 *Schütz F, Maleika A, Poeschl J et al.* Partnerships between medical centres and general hospitals providing normal care standards in gynaecology and obstetrics in Germany. Geburtsh Frauenheilk 2012; 72: 922–926
